# Supplementary material for: Enhancing the Physiochemical Properties of Puerarin via L-Proline Co-Crystallization: Synthesis, Characterization, and Dissolution Studies of Two Phases of Pharmaceutical Co-Crystals
Source: PubMed Central journal article supplement (PMC7832312; doi:10.3390/ijms22020928), 2021-01-18
Supplement: ijms-22-00928-s001.pdf [file ijms-22-00928-s001.pdf]

**Enhancing the Physiochemical Properties of Puerarin via L-Proline Co-crystallization: Synthesis, Characterization, and Dissolution Studies of Two Phases of Pharmaceutical Co-crystals**

Muhammad Inam, Lu Liu, Jian-Wei Wang, Ka-Xi Yu, Chi-Uyen Phan, Jie Shen, Wen-Hua Zhang,  
Guping Tang and Xiurong Hu\*

**Table of Contents**

|                                                                                                                                 |   |
|---------------------------------------------------------------------------------------------------------------------------------|---|
| <b>Figure S1</b> The <sup>1</sup> H NMR spectra of free PUE (a), PRO (b), I (c), and II (d).....                                | 3 |
| <b>Figure S2</b> The FT-IR spectra of I (a) and II (b).....                                                                     | 4 |
| <b>Figure S3</b> The TGA-DSC diagrams of I (a) and II (b).....                                                                  | 5 |
| <b>Figure S4.</b> The cell viability data of PUE, I, and II against colon cancer CT-26 cell lines upon culturing 48 h.<br>..... | 6 |
| <b>Table S1</b> Hydrogen-bonding tables (Å and °) for I and II. ....                                                            | 7 |
| <b>Table S2</b> A list of the solubility (mg/mL) of PUE, I, and II. ....                                                        | 8 |
| <b>Table S3</b> Time-dependent dissolution rate (mg/mL) of PUE, I, and II in different medium.....                              | 9 |

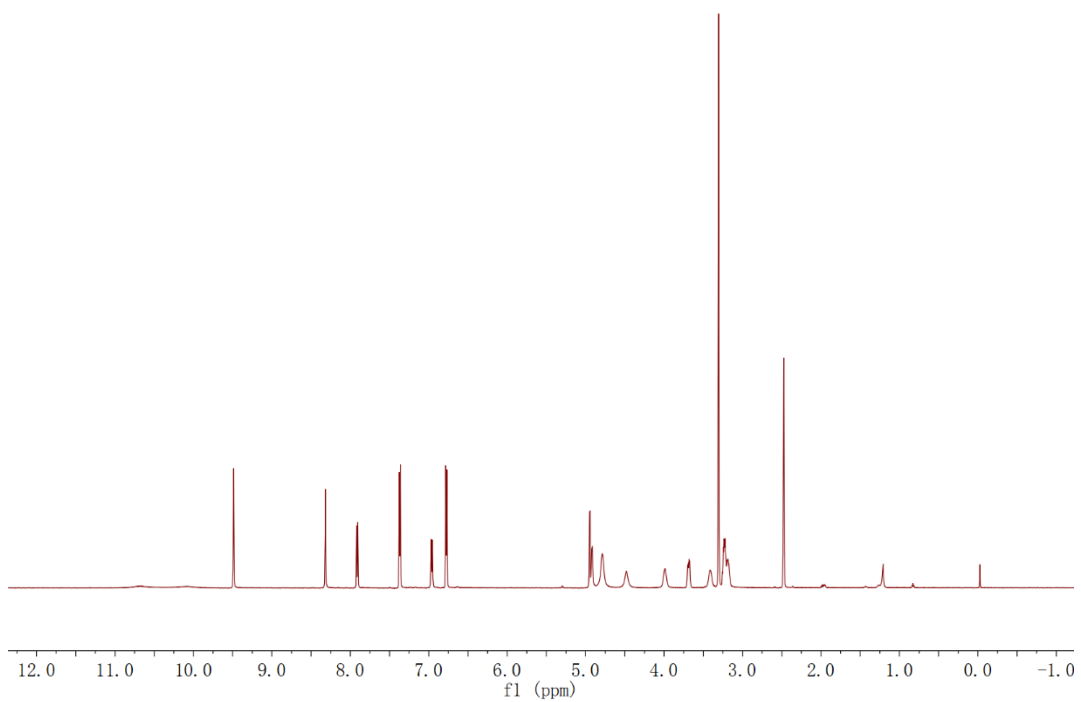

(a)

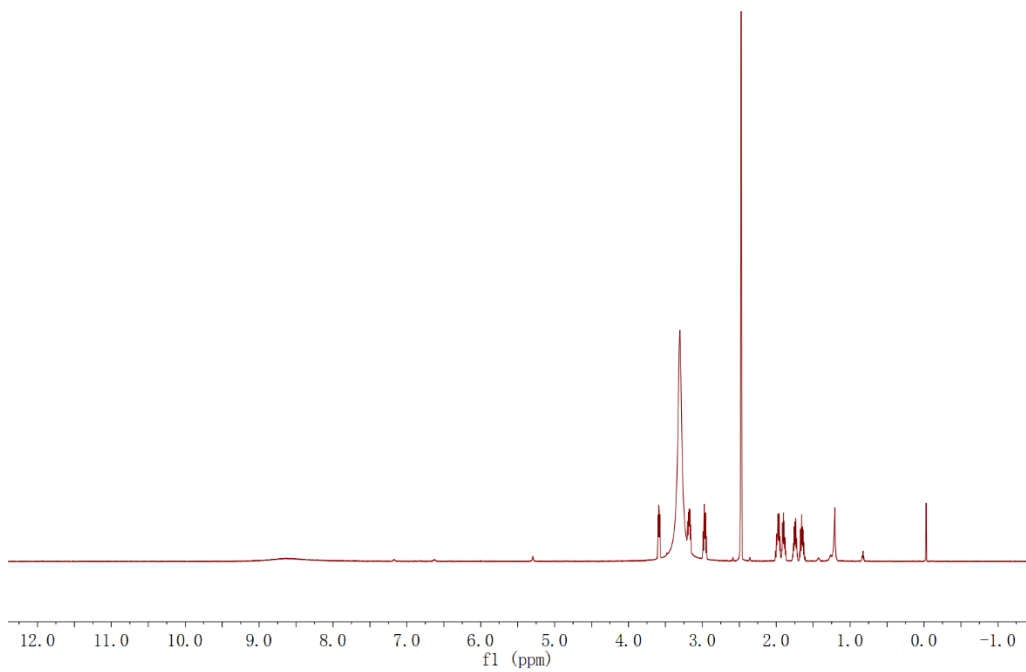

(b)

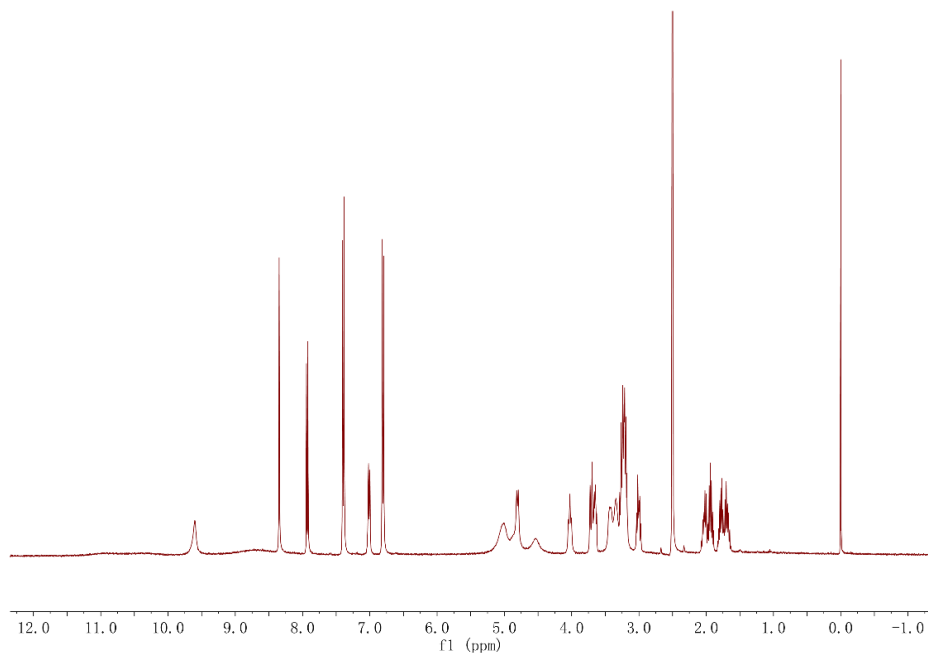

(c)

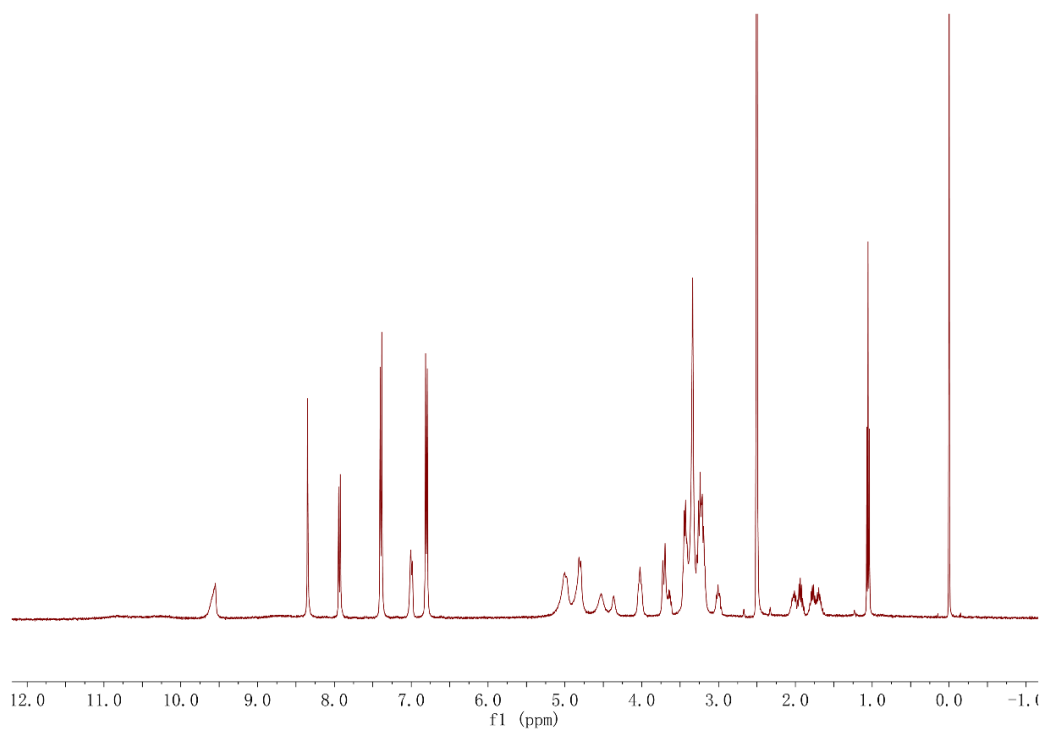

(d)

**Figure S1** The <sup>1</sup>H NMR spectra of free PUE (a), PRO (b), I (c), and II (d).

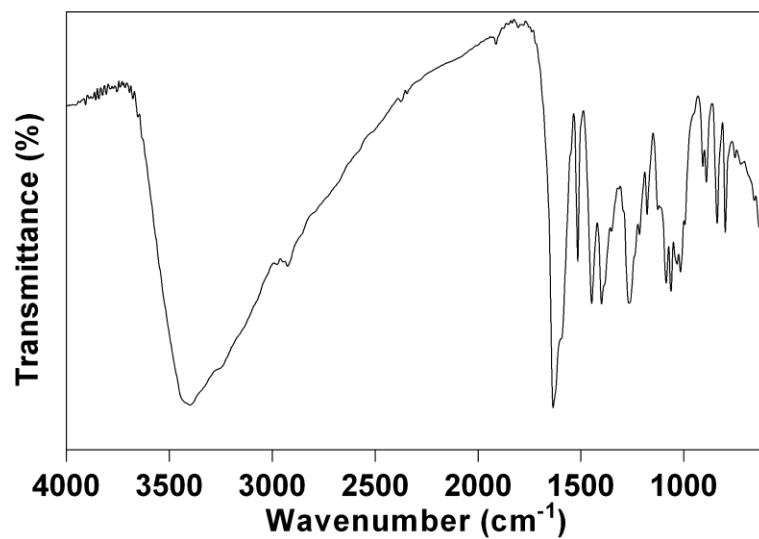

(a)

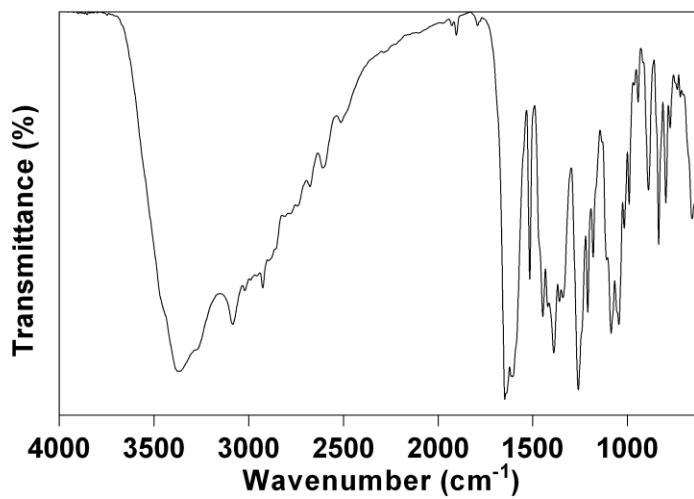

(b)

**Figure S2** The FT-IR spectra of I (a) and II (b).

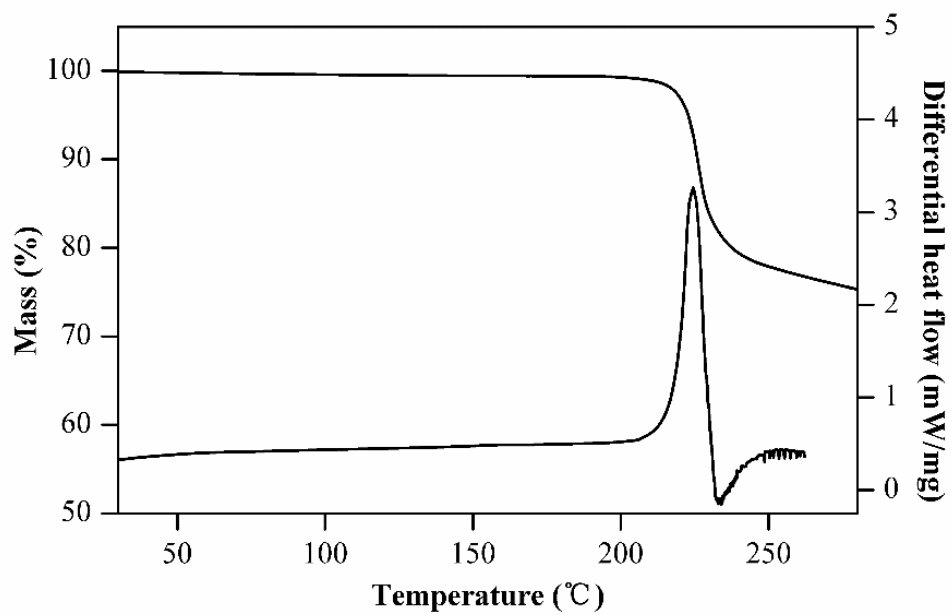

(a)

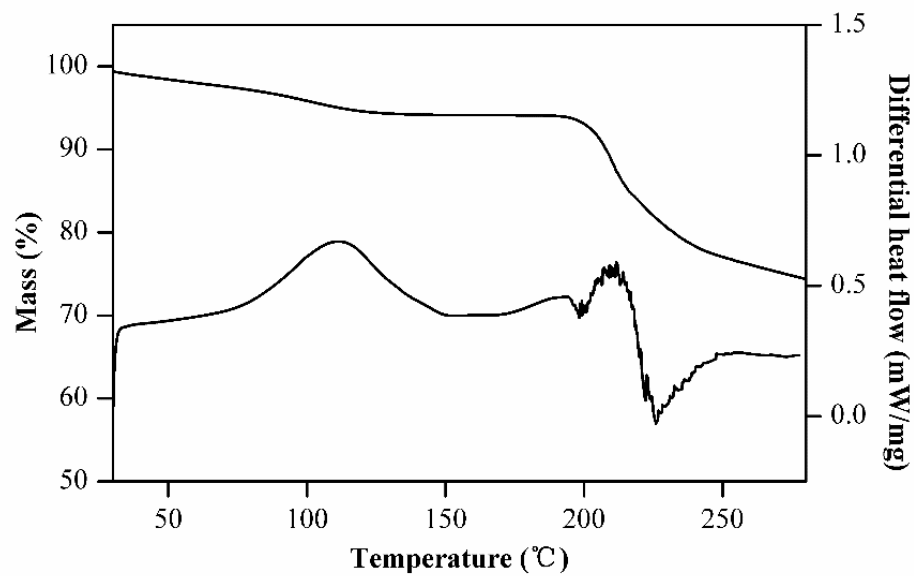

(b)

**Figure S3** The TGA-DSC diagrams of I (a) and II (b).

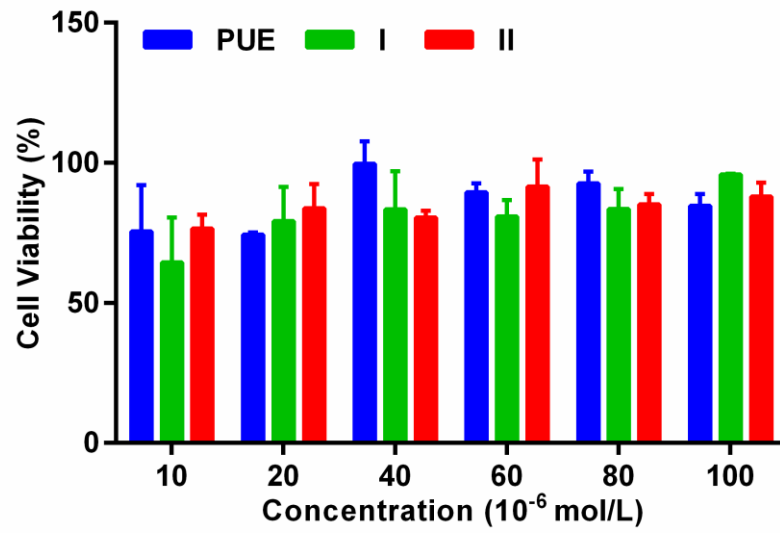

**Figure S4.** The cell viability data of PUE, I, and II against colon cancer CT-26 cell lines upon culturing 48 h.

**Table S1** Hydrogen-bonding tables (Å and °) for I and II.

| D-H...A                                                                                                                                                                   | d(D-H) | d(H...A) | d(D...A) | ∠(DHA) |
|---------------------------------------------------------------------------------------------------------------------------------------------------------------------------|--------|----------|----------|--------|
| <b>[PUE][PRO] (I)</b>                                                                                                                                                     |        |          |          |        |
| O(7)-H(7)...O(8)#1                                                                                                                                                        | 0.84   | 1.96     | 2.785(2) | 168.3  |
| O(9)-H(9)...O(6)#2                                                                                                                                                        | 0.84   | 2.11     | 2.851(2) | 146.3  |
| O(9)-H(9)...O(1)#3                                                                                                                                                        | 0.84   | 2.53     | 2.999(2) | 116.5  |
| O(8)-H(8)...O(10)                                                                                                                                                         | 0.84   | 1.97     | 2.785(2) | 164.0  |
| O(6)-H(6)...O(3)#4                                                                                                                                                        | 0.84   | 1.88     | 2.683(2) | 160.1  |
| O(4)-H(4)...O(5)                                                                                                                                                          | 0.84   | 1.92     | 2.627(2) | 141.8  |
| O(1)-H(1)...O(11)#5                                                                                                                                                       | 0.84   | 1.86     | 2.681(2) | 164.5  |
| N(1)-H(1B)...O(7)#6                                                                                                                                                       | 0.91   | 2.10     | 2.886(2) | 144.0  |
| N(1)-H(1A)...O(10)#6                                                                                                                                                      | 0.91   | 1.92     | 2.754(2) | 151.8  |
| N(1)-H(1B)...O(11)                                                                                                                                                        | 0.91   | 2.19     | 2.661(2) | 111.6  |
| Symmetry codes: #1 $-x, y - 1/2, -z + 2$ ; #2 $x, y + 1, z$ ; #3 $-x + 1, y + 1/2, -z + 1$ ; #4 $-x, y - 1/2, -z + 1$ ; #5 $x, y, z - 1$ ; #6 $-x + 1, y + 1/2, -z + 2$ . |        |          |          |        |
| <b>[PUE]<sub>2</sub>[PRO]·EtOH·(H<sub>2</sub>O)<sub>2</sub> (II)</b>                                                                                                      |        |          |          |        |
| O(1B)-H(1O1)...O(13)#1                                                                                                                                                    | 0.83   | 2.09     | 2.819(3) | 145.9  |
| O(1A)-H(1A)...O(5B)#2                                                                                                                                                     | 0.82   | 2.28     | 3.092(3) | 172.6  |
| O(1A)-H(1A)...O(6B)#2                                                                                                                                                     | 0.82   | 2.41     | 2.862(3) | 116.1  |
| O(4A)-H(4A)...O(5A)                                                                                                                                                       | 0.82   | 1.93     | 2.632(2) | 143.7  |
| O(4B)-H(1O4)...O(5B)                                                                                                                                                      | 0.83   | 2.45     | 3.086(2) | 133.7  |
| O(6B)-H(6B)...O(8A)#3                                                                                                                                                     | 0.82   | 1.94     | 2.756(3) | 175.6  |
| O(7B)-H(7B)...O(13)#4                                                                                                                                                     | 0.82   | 1.95     | 2.770(2) | 174.5  |
| O(7A)-H(7A)...O(7B)#5                                                                                                                                                     | 0.82   | 1.95     | 2.747(2) | 165.1  |
| O(8A)-H(8A)...O(10)                                                                                                                                                       | 0.82   | 1.87     | 2.677(3) | 165.9  |
| O(8B)-H(8B)...O(10)#4                                                                                                                                                     | 0.82   | 1.92     | 2.727(3) | 167.8  |
| O(14)-H(1W)...O(6B)#6                                                                                                                                                     | 0.83   | 2.25     | 2.938(3) | 140.4  |
| O(14)-H(1W)...O(7A)#2                                                                                                                                                     | 0.83   | 2.26     | 2.848(3) | 128.5  |
| O(14)-H(2W)...O(1A)#7                                                                                                                                                     | 0.83   | 2.47     | 3.155(4) | 139.9  |
| N(1)-H(1C)...O(14)                                                                                                                                                        | 0.89   | 1.91     | 2.786(3) | 169.4  |
| N(1)-H(1D)...O(11)                                                                                                                                                        | 0.89   | 2.13     | 2.604(3) | 112.5  |
| N(1)-H(1D)...O(12)                                                                                                                                                        | 0.89   | 2.05     | 2.841(4) | 148.3  |
| Symmetry codes: #1 $x - 1, y + 1, z$ ; #2 $x, y - 1, z$ ; #3 $x, y, z + 1$ ; #4 $x - 1, y, z + 1$ ; #5 $x + 1, y, z - 1$ ; #6 $x, y - 1, z - 1$ ; #7 $x, y, z - 1$ .      |        |          |          |        |

**Table S2** A list of the solubility (mg/mL) of PUE, I, and II.

| Dissolution Medium               | PUE     |        | I       |        | II      |        |
|----------------------------------|---------|--------|---------|--------|---------|--------|
|                                  | Average | SD (%) | Average | SD (%) | Average | SD (%) |
| Distilled Water                  | 2.528   | 1.621  | 5.858   | 0.478  | 5.865   | 0.374  |
| gastrointestinal tract at pH 1.2 | 1.513   | 1.247  | 3.972   | 0.249  | 3.470   | 1.674  |
| phosphate buffer at pH 6.8       | 2.487   | 1.247  | 4.430   | 0.245  | 4.832   | 0.283  |



**Table S3** Time-dependent dissolution rate (mg/mL) of PUE, I, and II in different medium.

| Time (min) | PUE           |        | I       |        | II      |        |
|------------|---------------|--------|---------|--------|---------|--------|
|            | Average       | SD (%) | Average | SD (%) | Average | SD (%) |
|            | <b>Water</b>  |        |         |        |         |        |
| 5          | 0.062         | 0.000  | 0.220   | 0.094  | 0.131   | 0.094  |
| 10         | 0.109         | 0.094  | 0.343   | 0.125  | 0.210   | 0.082  |
| 15         | 0.190         | 0.125  | 0.452   | 0.047  | 0.281   | 0.170  |
| 20         | 0.250         | 0.327  | 0.533   | 0.294  | 0.457   | 0.125  |
| 25         | 0.294         | 0.386  | 0.591   | 0.205  | 0.567   | 0.047  |
| 30         | 0.506         | 0.047  | 0.674   | 0.189  | 0.701   | 0.125  |
| 40         | 0.611         | 0.216  | 0.767   | 0.163  | 1.450   | 0.082  |
| 50         | 0.692         | 0.356  | 0.945   | 0.327  | 2.110   | 0.082  |
| 60         | 0.821         | 0.170  | 1.045   | 0.368  | 2.490   | 0.000  |
| 80         | 0.896         | 0.082  | 1.373   | 0.330  | 2.840   | 0.000  |
| 100        | 0.935         | 0.125  | 1.503   | 0.283  | 3.203   | 0.424  |
| 120        | 1.031         | 0.170  | 1.645   | 0.400  | 3.410   | 0.818  |
|            | <b>pH 1.2</b> |        |         |        |         |        |
| 5          | 0.008         | 0.025  | 0.013   | 0.170  | 0.171   | 0.526  |
| 10         | 0.019         | 0.017  | 0.035   | 0.125  | 0.240   | 0.047  |
| 15         | 0.023         | 0.021  | 0.122   | 0.170  | 0.337   | 0.017  |
| 20         | 0.030         | 0.065  | 0.192   | 0.125  | 0.417   | 0.094  |
| 25         | 0.035         | 0.019  | 0.249   | 0.170  | 0.479   | 0.009  |
| 30         | 0.043         | 0.248  | 0.356   | 0.125  | 0.534   | 0.330  |
| 40         | 0.163         | 0.429  | 0.588   | 0.170  | 1.005   | 0.000  |
| 50         | 0.354         | 0.005  | 0.711   | 0.170  | 1.342   | 0.330  |
| 60         | 0.394         | 0.640  | 0.958   | 0.082  | 1.489   | 0.170  |
| 80         | 0.435         | 0.682  | 1.159   | 0.294  | 1.683   | 0.309  |
| 100        | 0.568         | 0.680  | 1.383   | 0.163  | 1.923   | 0.094  |
| 120        | 0.685         | 0.896  | 1.603   | 0.294  | 2.005   | 0.063  |
|            | <b>pH 6.8</b> |        |         |        |         |        |
| 5          | 0.078         | 0.000  | 0.207   | 0.047  | 0.121   | 0.170  |
| 10         | 0.110         | 0.205  | 0.291   | 0.082  | 0.212   | 0.125  |
| 15         | 0.168         | 0.125  | 0.384   | 0.094  | 0.352   | 0.170  |
| 20         | 0.244         | 0.125  | 0.493   | 0.125  | 0.446   | 0.189  |
| 25         | 0.274         | 0.094  | 0.570   | 0.082  | 0.537   | 0.082  |
| 30         | 0.347         | 0.082  | 0.664   | 0.141  | 0.861   | 0.047  |
| 40         | 0.415         | 0.082  | 0.786   | 0.170  | 1.059   | 0.047  |
| 50         | 0.444         | 0.082  | 0.850   | 0.047  | 1.503   | 0.471  |
| 60         | 0.504         | 0.094  | 0.918   | 0.205  | 2.210   | 0.047  |
| 80         | 0.560         | 0.000  | 1.183   | 0.170  | 2.723   | 0.250  |
| 100        | 0.641         | 0.082  | 1.265   | 0.082  | 3.138   | 0.589  |
| 120        | 0.785         | 0.050  | 1.303   | 0.170  | 3.370   | 0.245  |
